# Supplementary material for: Implications of the three-dimensional chromatin organization for genome evolution in a fungal plant pathogen
Source: PubMed Central journal article supplement (PMC10894299; doi:10.1038/s41467-024-45884-x), 2024-02-24
Supplement: 41467_2024_45884_MOESM1_ESM.pdf [file 41467_2024_45884_MOESM1_ESM.pdf]

## SUPPLEMENTARY INFORMATION

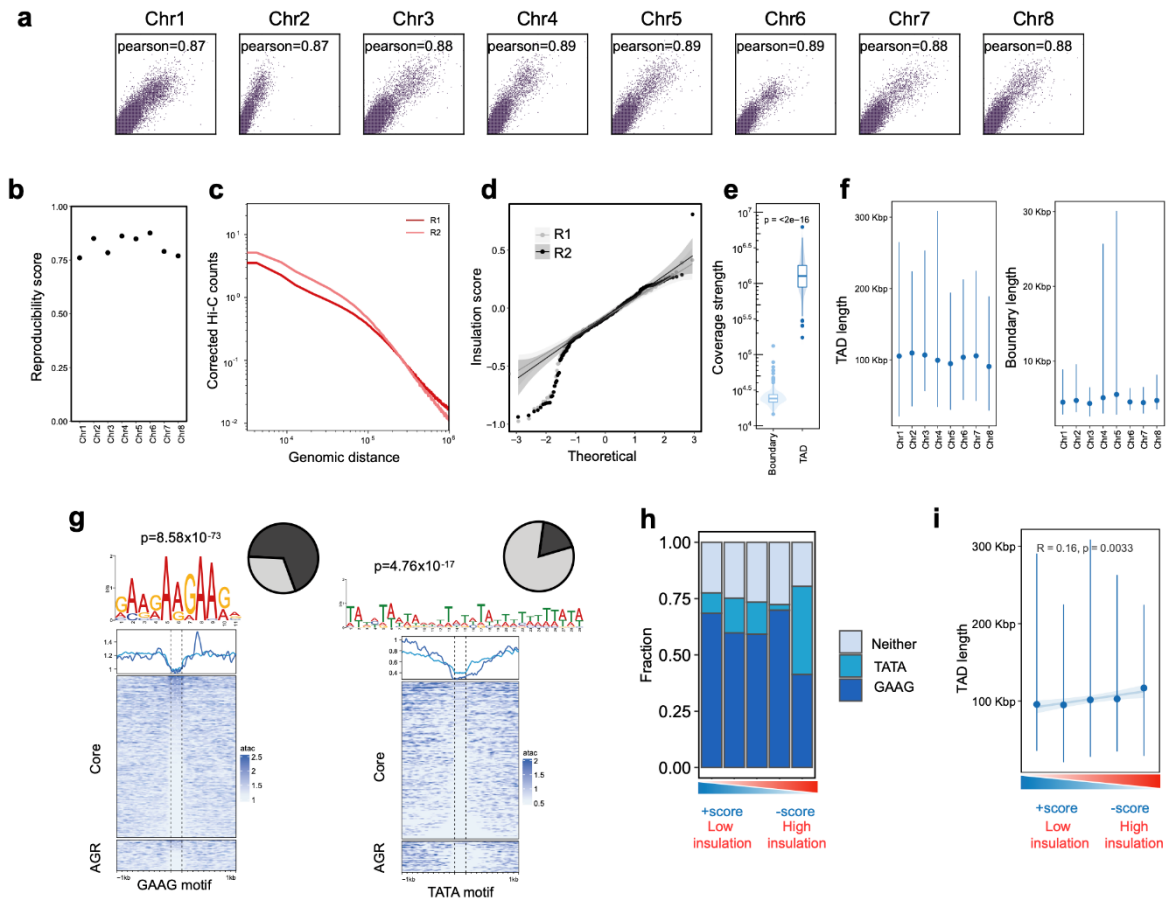

**Figure S1. Characteristics of TADs and TAD boundaries in *Verticillium dahliae* strain JR2.** (a) Pearson correlation between replicates of Hi-C interactions for *V. dahliae* strain JR2 divided per chromosome. (b) Reproducibility score based on a stratified cross-correlation of interactions between replicates of Hi-C interactions for *V. dahliae* strain JR2 divided per chromosome. (c) Distance-dependent interaction frequency in replicates of Hi-C data for *V. dahliae* strain JR2. (d) Quantile-Quantile plot of insulation scores calculated for each Hi-C replicate, confirming non-significant differences between replicates. (e) Coverage strength (Hi-C counts) over boundaries (n=345) and bodies of TADs (n=353) in merged replicates, showing that boundaries are depleted of interactions. P-value after one-sided Wilcoxon rank sum test. Box plots depict center line, median; box limits, upper and lower quartiles; whiskers, 1.5× interquartile range. (f) Length of TADs bodies (n=345) and boundaries (n=353) predicted for the merged replicates, divided per chromosome. Center dots depict the median; line ranges depict the upper and lower 1.5× interquartile range. (g) A GAAG-motif (left) and TATA-motif (right) is enriched in TAD boundaries of *V. dahliae* strain JR2 and correlate with a decrease in chromatin accessibility as determined by the assay for transposase accessible chromatin (ATAC). The top plot displays the average ATAC signal over TATA motifs with 1 kb up- and down-stream sequence in the core genome (light blue) and in AGRs (dark blue). P-value after Fisher's exact test for enrichment. Heatmap display ATAC signal around the GAAG and TATA motifs as rows in the core genome and in AGRs, respectively. (h) Occurrence of the GAAG-motif and the TATA-motif in boundaries separated based on their insulation score. (i) Correlation between boundary insulation score and length of adjacent TAD for boundary quintiles separated based on their insulation score. Center dots depict the median; line ranges depict the upper and lower 1.5× interquartile range.



analyses. **(c)** Centromeric TAD prediction at different binning strategies, when compared with centromeric regions previously defined by CenH3 and repeat content (Seidl et al., 2020). P-value after one-way Wilcoxon rank sum test. Upper numbers in brackets depict the total number of centromeric TADs predicted for each binning strategy. Box plots depict center line, median; box limits, upper and lower quartiles; whiskers,  $1.5\times$  interquartile range. **(d)** TAD boundary regions (n=539) at 2 kb resolution uncover nested TADs and recapitulate the distinctive features of TAD boundaries in *V. dahliae* at the 4 kb binning strategy. From top to bottom: Average density of genes and transposable elements (TEs) per 1 kb window; open chromatin determined with ATAC-seq, and H3K27me3 normalized over a micrococcal nuclease digestion control centered over boundaries with 50 kb up- and down-stream sequence in the core genome and in adaptive genomic regions (AGRs) of *V. dahliae* strain JR2. On the right: boxplots display the conservation score of each TAD (grey, n=353) and boundary (blue, n=345) in the core genome and in AGRs. P-values based on a one-way Wilcoxon rank sum test. Box plots depict center line, median; box limits, upper and lower quartiles; whiskers,  $1.5\times$  interquartile range.

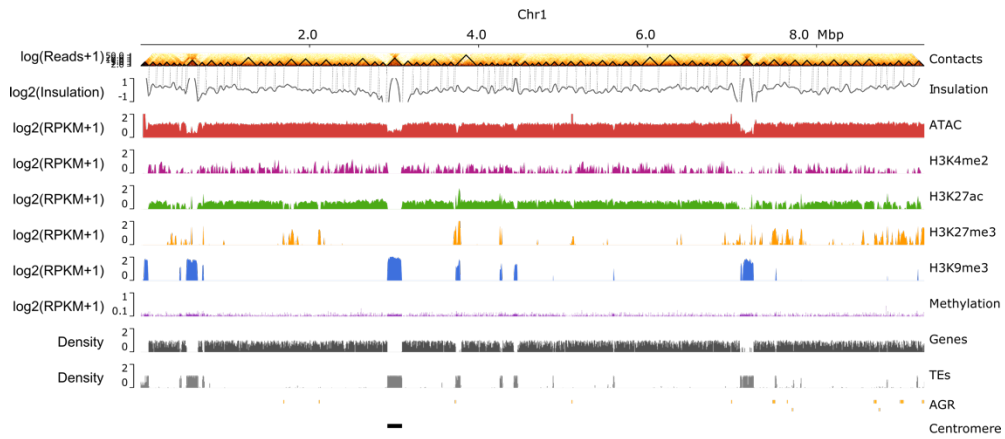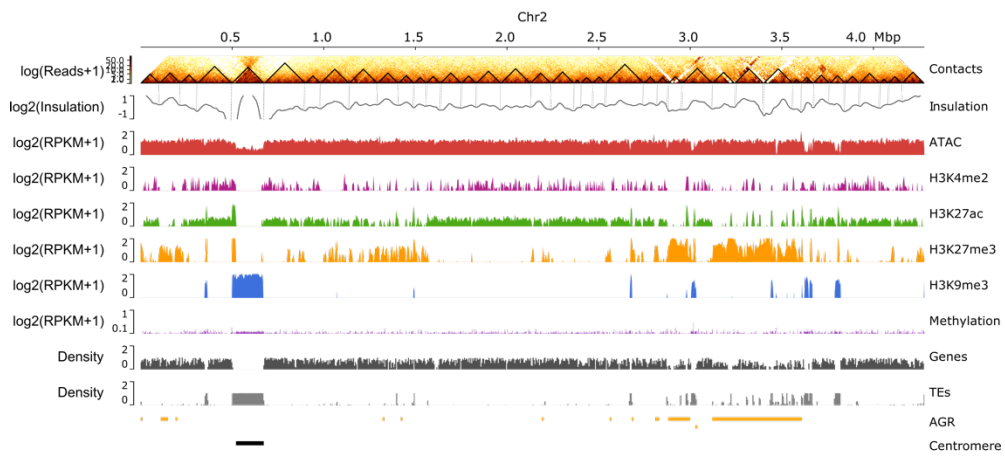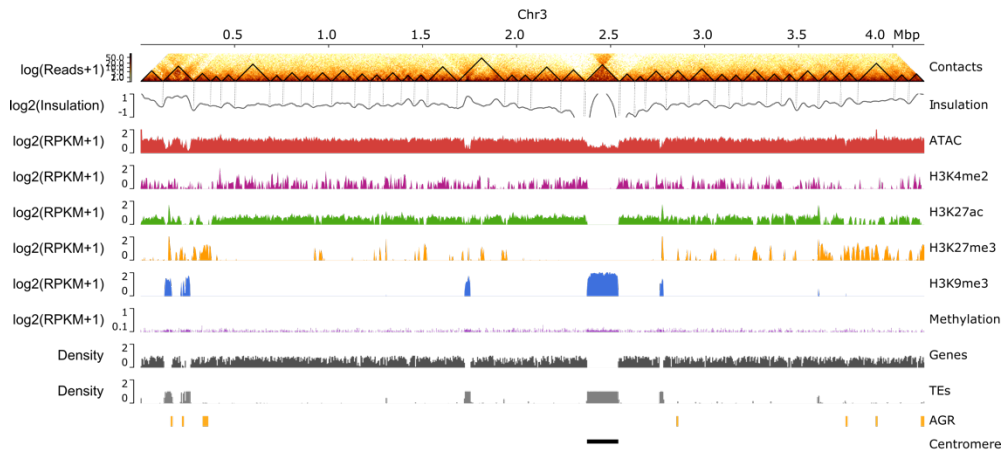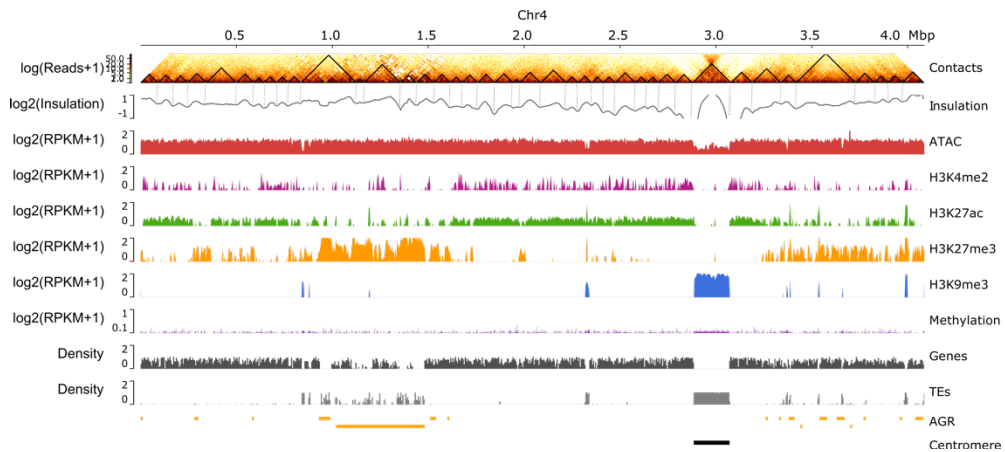

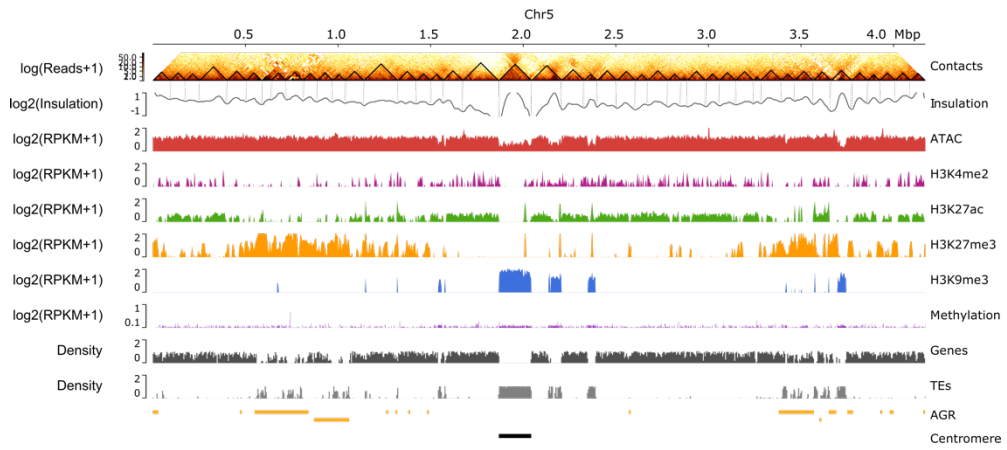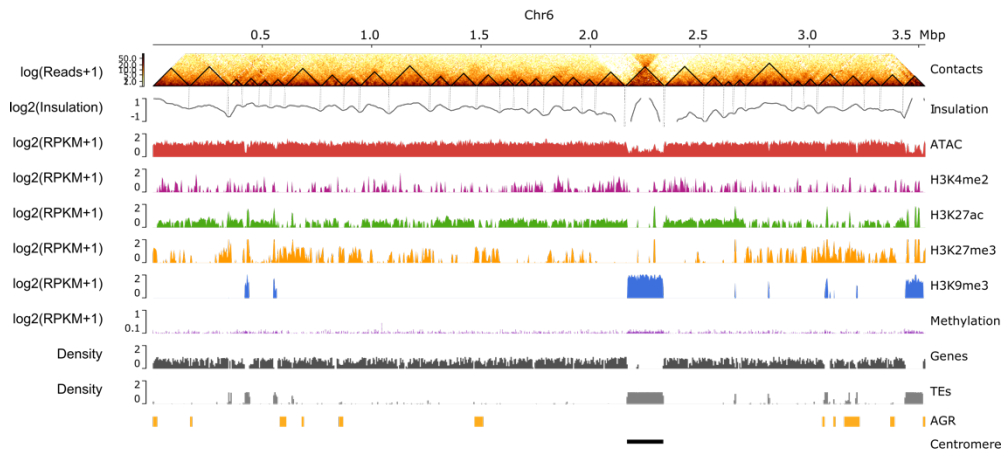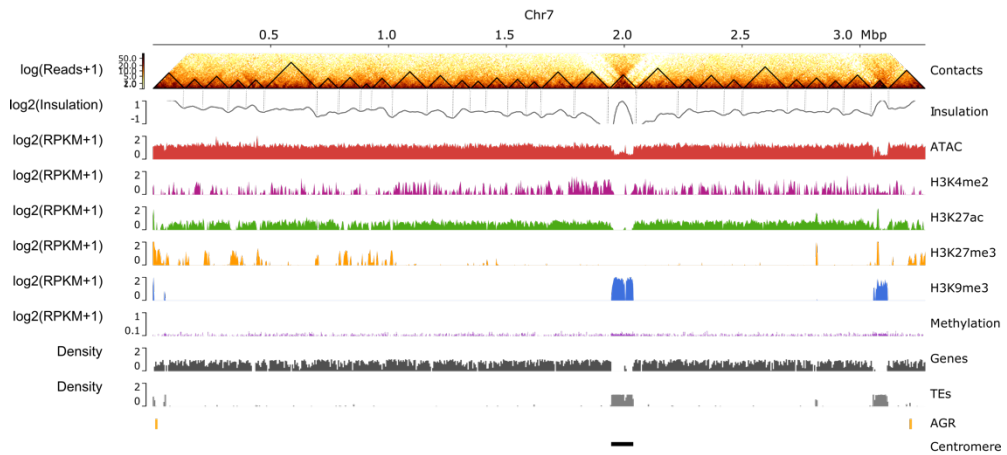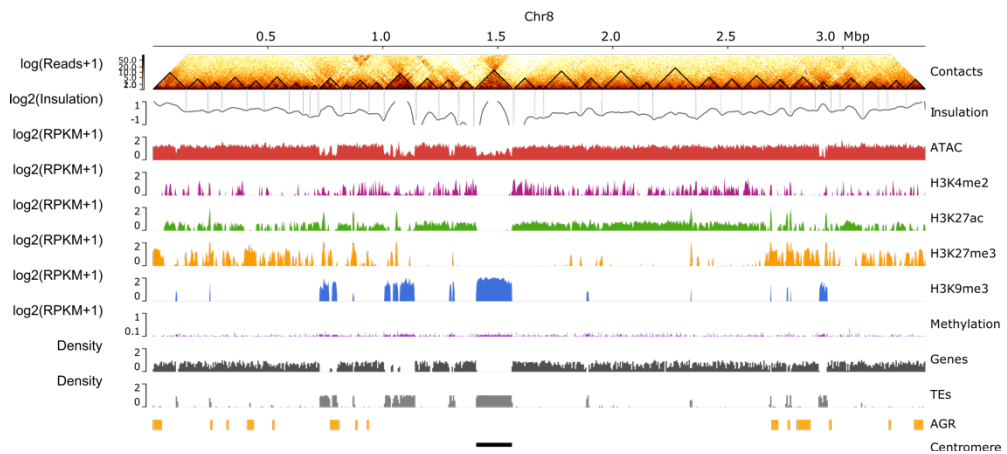

**Figure S3. Distribution of TADs over all chromosomes of *Verticillium dahliae* strain JR2.** From top to bottom: Chromosome sizes, Hi-C contact matrix depicting TADs as black triangles, insulation score mapping and vertical dashed lines showing the insulation decrease associated to TAD boundaries, open chromatin regions as determined with ATAC-seq, histone modifications H3K4me2, H3K27ac, H3K27me3, and H3K9me3 normalized over a micrococcal nuclease digestion control, DNA methylation, gene and transposable element (TE) densities in 10 kb windows, and adaptive genomic regions (AGRs) and centromeric regions.

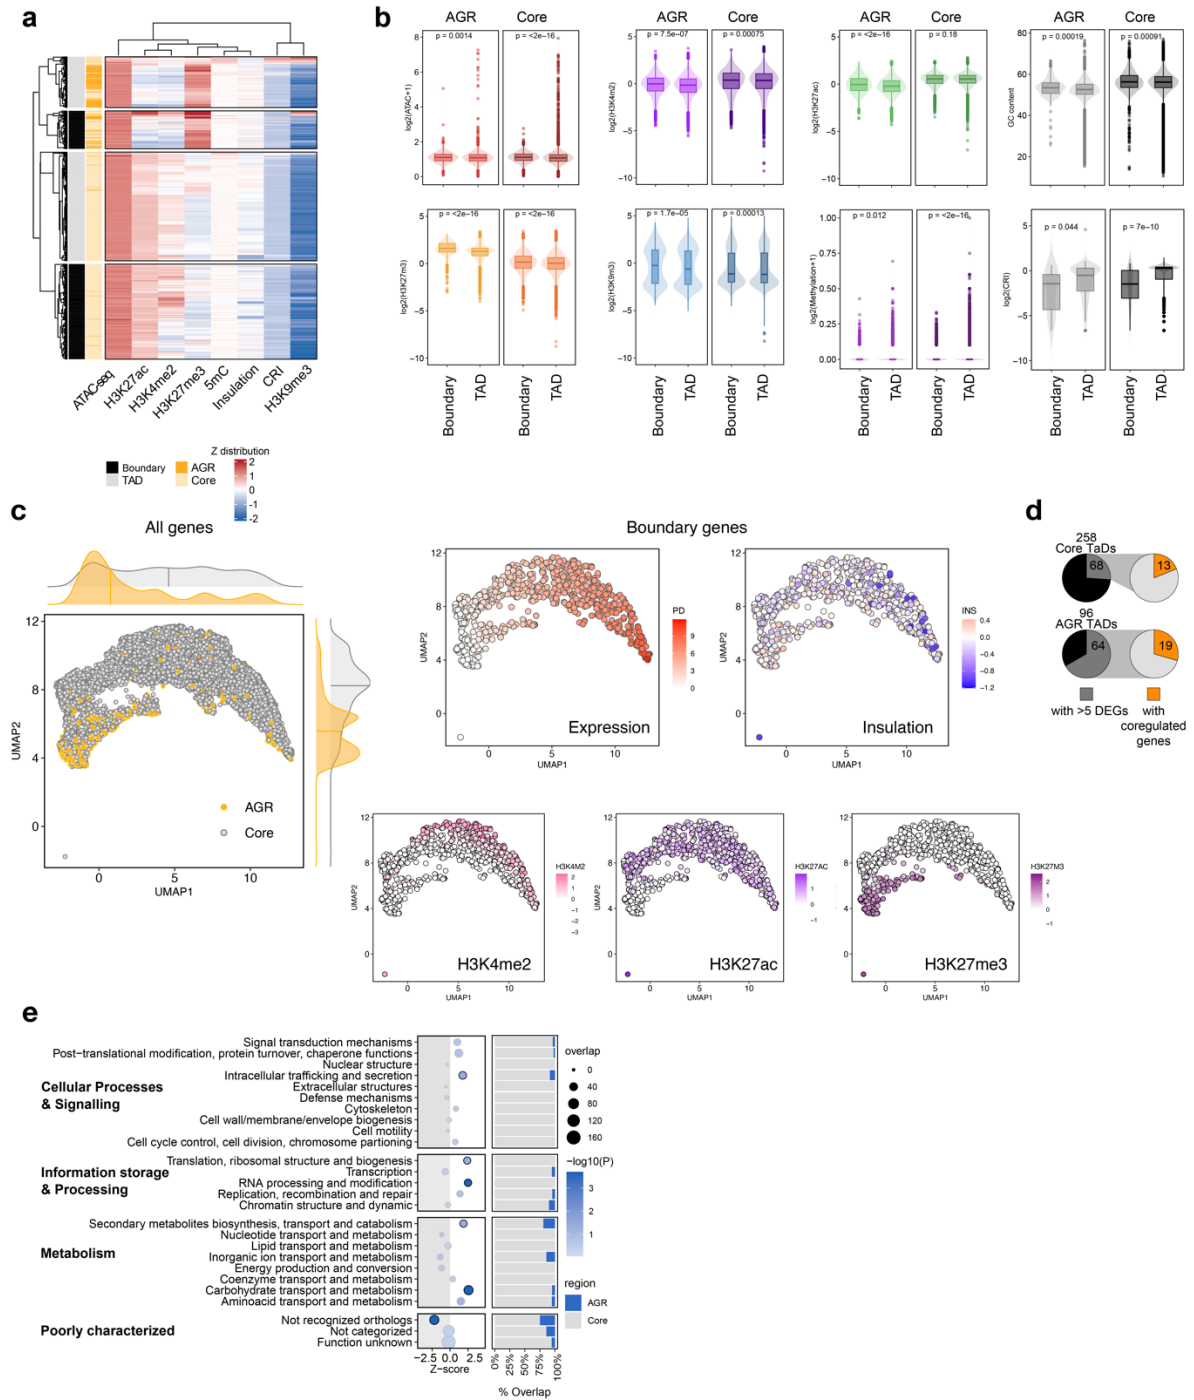

**Figure S4. Chromatin characteristics differentially associate with TADs and boundaries.** (a)  $k$ -means clustering ( $k=2$ ) of TADs and boundaries using data presented in Fig. 1E combined with insulation scores and composite repeat-induced point mutation (RIP) index (CRI) values averaged for 100 bp windows and summarized per TAD and boundary region. (b) TADs and TAD boundaries differ in histone modifications, CRI, and RIP. P-value after one-way Wilcoxon rank sum test. TADs  $n=277$ , 76 for core genome and AGRs, respectively. Boundaries  $n=308$ , 39 for core genome and AGRs, respectively. Box plots depict center line, median; box limits, upper and lower quartiles; whiskers,  $1.5\times$  interquartile range. (c) Uniform Manifold Approximation and Projection for Dimensional Reduction (UMAP) to separate genes of *Verticillium dahliae* strain JR2 according to their epigenetic profile, i.e., DNA methylation, CRI (Composite Repeat Index), H3K27ac, H3K27me3, H3K4me2, and H3K9me3. The left top plot displays all genes in the core genome (grey) and in AGRs (yellow). Distributions are shown on top and right of the plot. The remaining plots display only genes located at TAD boundaries

and are coloured according to their transcription in PDB (TPM PDB), the insulation score of the boundary they locate in, their H3K4me2 ChIP coverage signal, their H3K4ac ChIP coverage signal, and their H3K27me3 ChIP coverage signal. **(d)** Pie chart showing the proportion of TADs in the core genome and in AGRs containing more than five differentially expressed genes between cultivation for 6 days in PDB or in CZA (grey), and for which DEGs display directionality of differential expression (orange). **(e)** Cluster for orthologs (COGs) gene enrichment in TAD boundaries. The y-axis depicts the COG categories and the x-axis the z-score after a permutation test (10,000 iterations); negative z score indicates depletion, while positive z score shows enrichment. The significance is shown as  $-\log_{10}(\text{FDR adjusted p-value})$  and is color-coded; circle size is relative to the number of genes overlapping in boundaries per each category. The bar charts on the right indicates the proportion of genes in boundaries that occur in the core genome and AGRs.







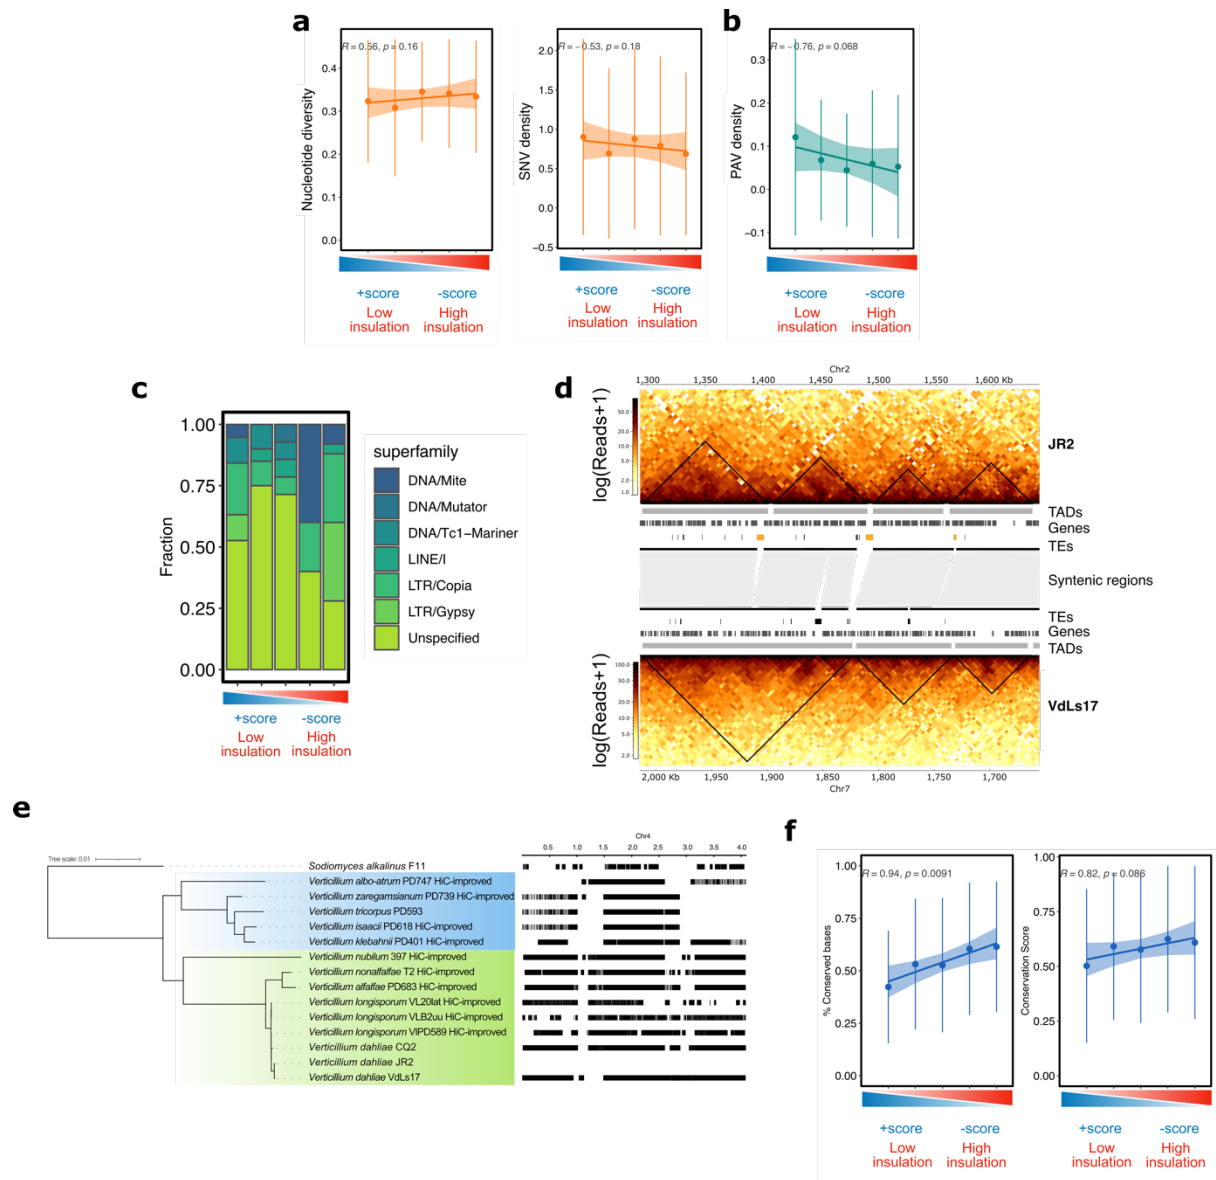

their insulation strength. Center dots depict the median; line ranges depict the upper and lower 1.5× interquartile range.

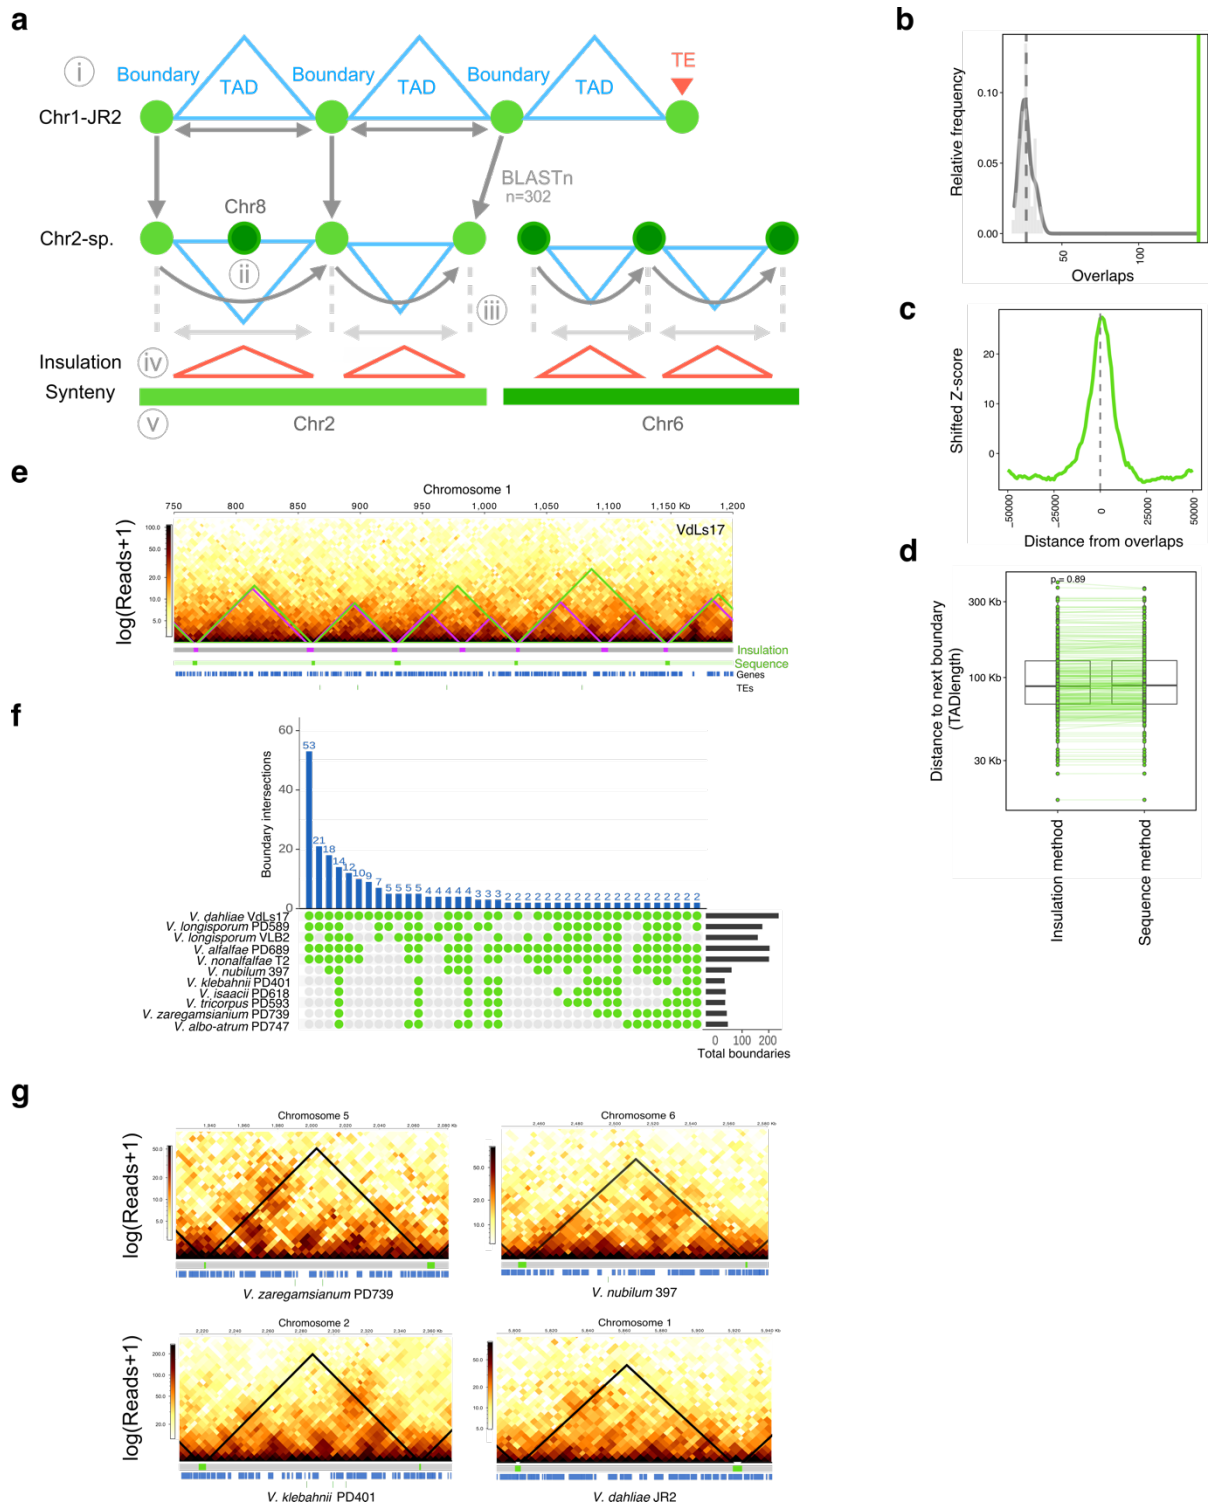

**Figure S8. Predicted TAD boundaries in the *Verticillium* genus display low insulation when compared with adjacent genomic regions. (a)** Overview of our approach to predict the TAD organization in *Verticillium* species with a schematic representation of the *V. dahliae* JR2 reference TAD organization on top, boundaries as green circles and TADs as blue triangles. i) 302 DNA sequences from boundaries (excluding those with TE insertions) were obtained and compared to the genomes of *Verticillium* spp. ii) Contiguous sequences belonging to same chromosome were retained and single interrupting matches from other chromosomes were removed. iii) The distances between contiguous boundaries were calculated in reference and subject. iv) Predicted boundaries were compared to the calculated insulation score from the Hi-C data. v) Predicted boundary locations were

compared to the progressive Cactus syntenic regions to crosscheck boundary distribution. **(b)** Distribution of 10,000 iterations of the one-sided permutation test for overlaps between the boundaries as predicted for *V. dahliae* strain VdLs17 by the sequence-based method and by the insulation method (grey distribution), the green line indicates significant overlaps between predicted and ‘reference’ boundaries from *V. dahliae* VdLs17 (Fig. 3), Z-score=27.1264, p=9.9x10<sup>-5</sup>. **(c)** Z-score shifts from boundaries indicate a high enrichment of overlapping TAD boundaries for the two methods. **(d)** TAD length prediction distribution by the insulation method (n=345) and the sequence method (n=269) is not significantly different. P-value after one-way Wilcoxon rank sum test. Box plots depict center line, median; box limits, upper and lower quartiles; whiskers, 1.5× interquartile range. **(e)** Overlap in TAD prediction for strain VdLs17 using the insulation method (purple triangles) and the JR2-sequence-based method (green triangles), with partial chromosome 1 of the strain VdLs17 (755,315-1167941 bp) as example. Tracks depict in grey and purple, TADs and boundaries by the insulation method respectively; in light green and green, TADs and boundaries by the sequence-based method respectively; Genes in blue and TEs in green. **(f)** TAD boundaries predicted in the ten *Verticillium* species ordered according to JR2-sequence-based method, on the bottom-right the total number of boundaries predicted in each species. On the bottom, a combination matrix depicting combinations of species (in green) in which boundaries are shared. On the top, the total amount of boundaries shared for each species combination. **(g)** TADs are conserved in syntenic regions in the *Verticillium* genus. One syntenic TAD is shown in four species of the *Verticillium* genus. Black triangle indicates the TAD. Grey and green tracks depict TADs and boundaries respectively. Genes in blue and TEs in green.

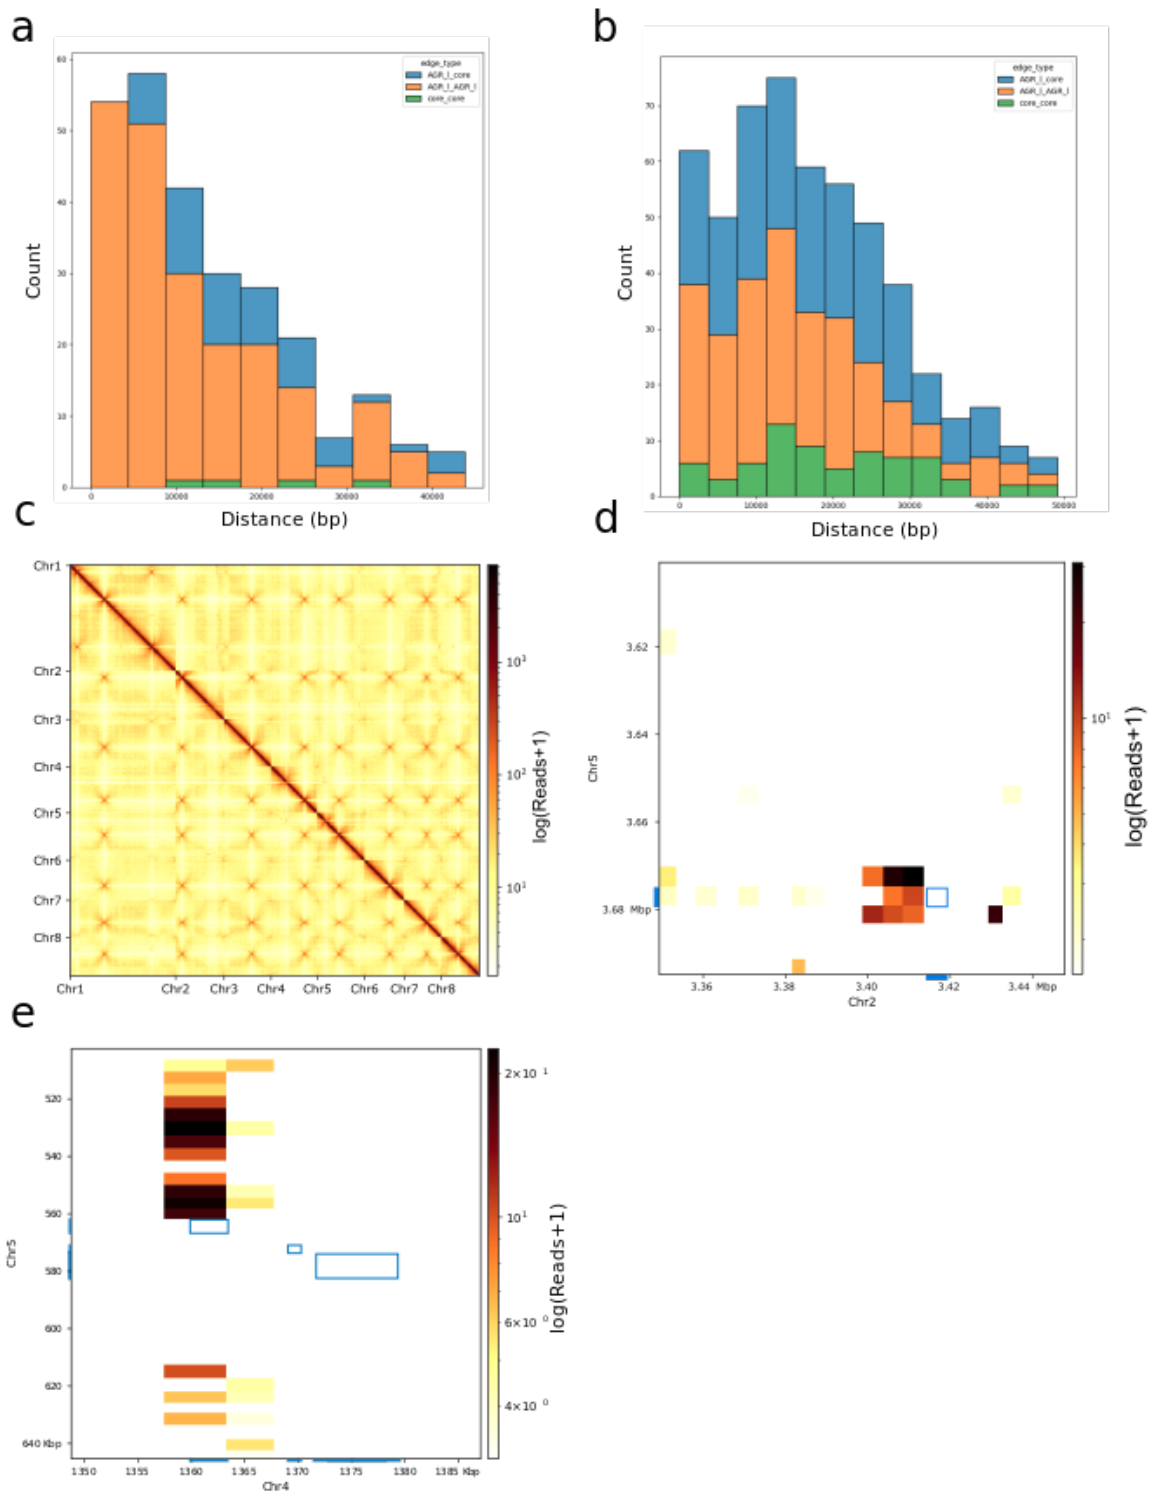

**Figure S9. Distance between colocalizing regions and neighboring duplicated regions in *Verticillium dahliae*.** (a) Duplicated regions occur in close proximity to physical co-located regions in *V. dahliae* JR2. The Y-axis depicts distance from co-located regions, and colors show the type of physical co-location event (AGR-to-Core, AGR-to-AGR, Core-to-Core). (b) Duplicated regions occur near physically co-located regions in *V. dahliae* VdLs17. The Y-axis depicts distance from co-located regions, and colors show the type of physical co-location event (AGR-to-core, AGR-to-AGR, core-to-

core). Colocalization events involving AGR-to-core regions are shown in blue, AGR-to-AGR regions in orange and core-to-core regions in green. (c) *Verticillium dahliae* strain JR2 Hi-C matrix showing the high interaction within chromosomes and between centromeric regions, suggesting a Rab1 configuration. (d-e) High interaction between AGRs in chromosome 5 and 2 and between chromosome 4 and 5 occurs in proximity to segmental duplications (blue box).

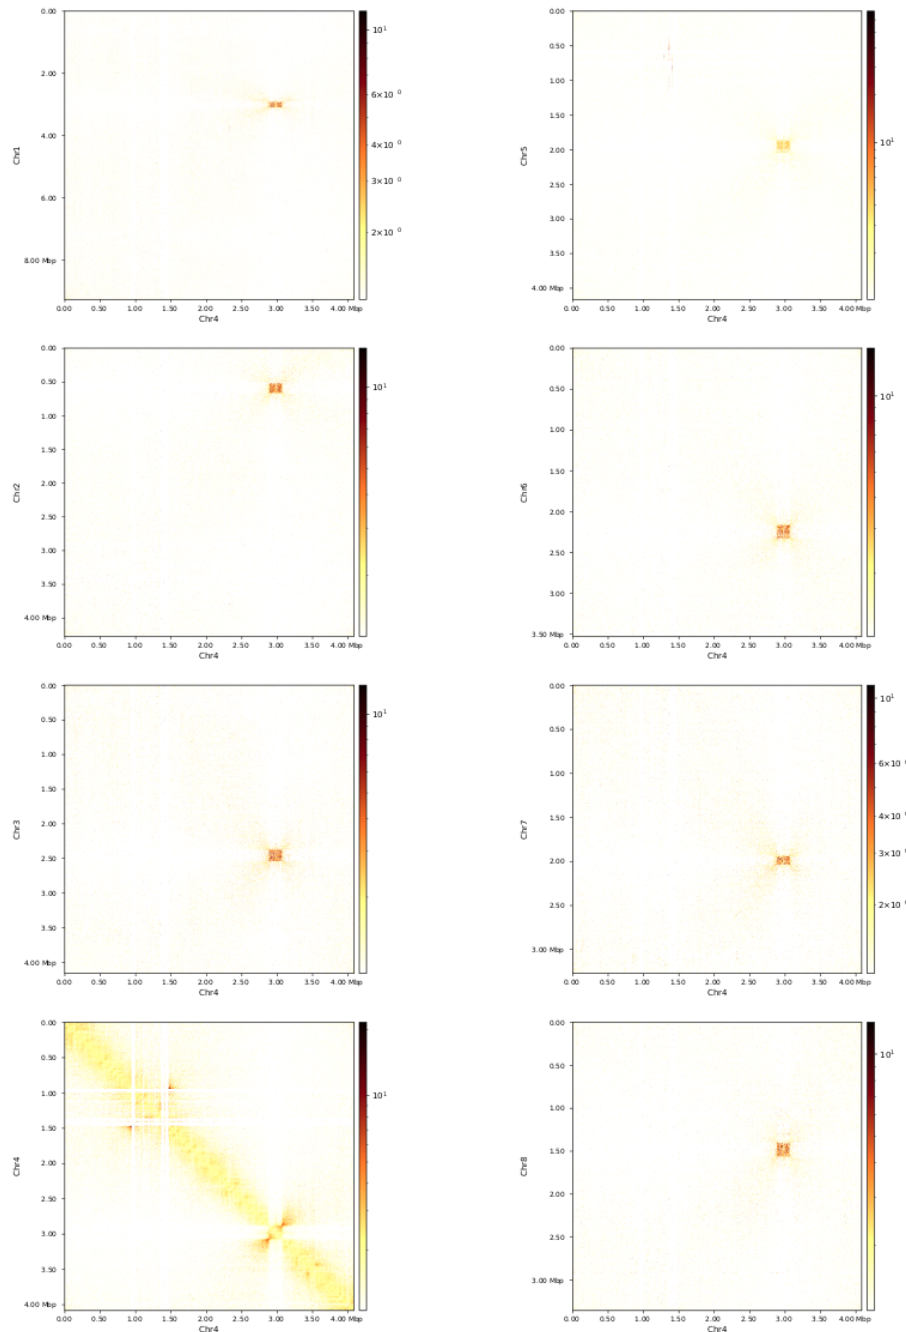

**Figure S10 Visual representation of inter- and intra-chromosomal physical interactions focused on chromosome 4 (x-axis).** Most of the inter-chromosomal physical interactions are associated with centromeric regions.



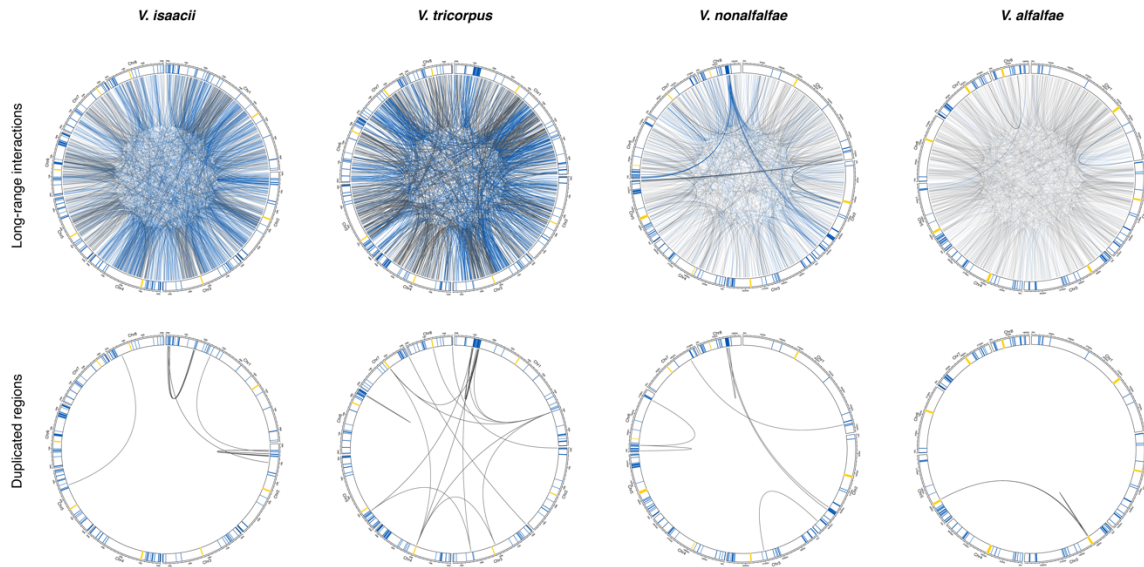

**Figure S11. Non-centromeric long-range interactions co-locate with duplicated regions in the *Verticillium* genus.** All circular plots display the chromosomes with centromeres in yellow, AGR regions in blue, and core regions in white. For every genome, the upper plot shows non-centromeric long-range interactions that exceed the average interaction strength of centromeres as edges and are color-coded according to the respective genomic annotation of the regions they connect, with AGR interactions in blue and core interactions in grey. In the lower plot, the edges represent segmental duplications.

**Table S1. Aggregated counts of long-range interactions in *Verticillium dahliae* and their overlap with segmental duplications**

|                       | <i>V. dahliae</i> strain JR2 | <i>V. dahliae</i> strain VdLs17 |
|-----------------------|------------------------------|---------------------------------|
| Genome-wide           | 1842                         | 1978                            |
| Centromere            | 953                          | 527                             |
| Non-centromere        | 889                          | 1451                            |
| AGR                   | 475                          | 452                             |
| Core-AGR              | 225                          | 407                             |
| AGR-AGR               | 250                          | 45                              |
| Core-core             | 414                          | 999                             |
| Segmental duplication | 264                          | 50                              |
| AGR-AGR               | 207                          | 21                              |
| Core-AGR              | 53                           | 20                              |

**Table S2. Expected and observed non-centromeric colocalization events between genetically distant regions in *Verticillium*.**

| <b>Species</b>           | <b>Non-centromeric colocalization events</b> | <b>Expected core</b> | <b>Observed core</b> | <b>Expected AGR</b> | <b>Observed AGR</b> | <b>p-value<sup>a</sup></b> |
|--------------------------|----------------------------------------------|----------------------|----------------------|---------------------|---------------------|----------------------------|
| <i>V. dahliae</i> JR2    | 889                                          | 880                  | 639                  | 162                 | 475                 | 6.8695E-148                |
| <i>V. dahliae</i> VdLs17 | 1451                                         | 1442                 | 999                  | 217                 | 452                 | 6.1638E-87                 |
| <i>V. albo-atrum</i>     | 897                                          | 893                  | 880                  | 111                 | 143                 | 0.002152792                |
| <i>V. klebahnii</i>      | 573                                          | 571                  | 571                  | 65                  | 178                 | 1.24565E-44                |
| <i>V. nubilum</i>        | 582                                          | 578                  | 572                  | 81                  | 173                 | 1.52804E-24                |
| <i>V. nonalfalfae</i>    | 891                                          | 887                  | 873                  | 105                 | 157                 | 3.46163E-07                |
| <i>V. isaacii</i>        | 1645                                         | 1639                 | 1632                 | 191                 | 132                 | 1.93215E-05                |
| <i>V. alfalfae</i>       | 1455                                         | 1450                 | 1453                 | 163                 | 71                  | 5.74392E-13                |
| <i>V. tricorpus</i>      | 1053                                         | 1048                 | 1051                 | 126                 | 73                  | 2.32935E-06                |
| <i>V. longisporum</i>    | 2426                                         | 2420                 | 2407                 | 231                 | 234                 | 0.741519345                |
| <i>V. longisporum</i>    | 1201                                         | 1198                 | 1195                 | 110                 | 91                  | 0.069731441                |

<sup>a</sup>Based on a one-sided chi-square test between observed and expected colocalization events in the different genomic compartments.

**Table S3. Observed and expected association between genomic colocalization events among genetically distant regions and duplicated genomic regions.**

| <b>Species</b>           | <b>Observed duplication-colocalizations</b> | <b>Expected duplication-colocalizations<sup>a</sup></b> | <b>Duplication-colocalizations core</b> | <b>Duplication-colocalizations AGR</b> | <b>p-value<sup>b</sup></b> |
|--------------------------|---------------------------------------------|---------------------------------------------------------|-----------------------------------------|----------------------------------------|----------------------------|
| <i>V. dahliae</i> JR2    | 264                                         | 0.38                                                    | 57                                      | 260                                    | 1.06E-267                  |
| <i>V. dahliae</i> VdLs17 | 50                                          | 0.54                                                    | 29                                      | 41                                     | 4.21E-184                  |
| <i>V. albo-atrum</i>     | 11                                          | 0.23                                                    | 8                                       | 6                                      | 2.93E-133                  |
| <i>V. klebahnii</i>      | 24                                          | 0.06                                                    | 24                                      | 0                                      | 3.60E-200                  |
| <i>V. nubilum</i>        | 16                                          | 0.69                                                    | 15                                      | 13                                     | 6.92E-132                  |
| <i>V. nonalfalfae</i>    | 6                                           | 0.07                                                    | 3                                       | 5                                      | 4.01E-137                  |
| <i>V. isaacii</i>        | 13                                          | 0.11                                                    | 7                                       | 6                                      | 1.03E-157                  |
| <i>V. alfalfae</i>       | 0                                           | 0                                                       | 0                                       | 0                                      | 1.00E+00                   |
| <i>V. tricorpus</i>      | 4                                           | 0.09                                                    | 4                                       | 2                                      | 2.35E-114                  |
| <i>V. longisporum</i>    | 2400                                        | 3.63                                                    | 2381                                    | 232                                    | 0.00E+00                   |
| <i>V. longisporum</i>    | 296                                         | 1.82                                                    | 295                                     | 9                                      | 3.19E-235                  |

<sup>a</sup>Average of 100 permutations.

<sup>b</sup>Based on two-sided one-sample t-test of the observed duplicated regions neighboring colocalization events versus the expected distribution (100 permutations).

**Table S4. Association between genomic colocalization events among genetically distant regions and duplicated genomic regions.**

| <b>Species</b>           | <b>AGR-AGR</b> | <b>AGR-core</b> | <b>core-core</b> | <b>Total</b> |
|--------------------------|----------------|-----------------|------------------|--------------|
| <i>V. dahliae</i> JR2    | 207            | 53              | 4                | 264          |
| <i>V. dahliae</i> VdLs17 | 21             | 20              | 9                | 50           |
| <i>V. albo-atrum</i>     | 3              | 3               | 5                | 11           |
| <i>V. klebahnii</i>      | 0              | 0               | 24               | 24           |
| <i>V. nubilum</i>        | 1              | 12              | 3                | 16           |
| <i>V. nonalfalfae</i>    | 3              | 2               | 1                | 6            |
| <i>V. isaacii</i>        | 6              | 0               | 7                | 13           |
| <i>V. alfalfae</i>       | 0              | 0               | 0                | 0            |
| <i>V. tricorpus</i>      | 0              | 2               | 2                | 4            |
| <i>V. longisporum</i>    | 19             | 213             | 2168             | 2400         |
| <i>V. longisporum</i>    | 1              | 8               | 287              | 296          |
